# Supplementary material
Source: PubMed Central journal article supplement (PMC4116441)
Supplement: NIHMS606331-supplement-supplemental_methods.pdf [file NIHMS606331-supplement-supplemental_methods.pdf]

## **Supplemental Material**

The Nationwide Inpatient Sample (NIS) was developed as part of the Healthcare Cost and Utilization Project and is maintained by the Agency for Healthcare Research and Quality.<sup>1</sup> NIS contains hospitalization data on both patients and hospitals from 45 states using a 20% stratified sample of US community hospitals visits that are sampled to provide national estimates. Stroke visits were identified using ICD-9 CM codes 430.x, 431, 432.x, 433.x1, 434.x1 and 436. Descriptive statistics were used to compare stroke visits by age, race/ethnicity and insurance status taking into account the complex survey weighting. Analyses were performed using Stata 12 (College Station, TX: StataCorp LP).

The National Health Interview Survey (NHIS) is an annual face-to-face survey of on average 85,000 civilian, non-institutionalized persons conducted by the National Center for Health Statistics. NHIS oversamples African Americans and Hispanics. This cross-sectional data was obtained from the Integrated Public Use Microdata Series.<sup>2</sup> Stroke survivors were identified by the question "Have you ever been told by a doctor or other health professional that you had a stroke?" All respondents over the age of 18 were included. Descriptive statistics were used to describe stroke survivors by age, race/ethnicity, insurance status and disability status taking into account the complex survey weighting.

1. HCUP Nationwide Inpatient Sample (NIS). Healthcare Cost and Utilization Project (HCUP). 2010. Agency for healthcare research and quality, rockville, md. [www.hcup-us.ahrq.gov/nisoverview.jsp](http://www.hcup-us.ahrq.gov/nisoverview.jsp). Accessed May 7, 2014.
2. Steven Ruggles, J. Trent Alexander, Katie Genadek, Ronald Goeken, Matthew B. Schroeder, and Matthew Sobek. Integrated public use microdata series: Version 5.0 [machine-readable database]. Minneapolis: University of Minnesota, 2010.
